# Supplementary material
Source: PubMed Central journal article supplement (PMC4542444)
Supplement: supp_db14-1693_DB141693SupplementaryData.pdf [file supp_db14-1693_DB141693SupplementaryData.pdf]

SUPPLEMENTARY DATA

**Supplementary Table 1.** Characteristics of cases with newly-diagnosed type 1 diabetes and healthy controls included in DASP2009, DASP2010 and IASP2012 workshops.

| Cohort            | n   | Male | Age (range)          | Ethnicity* |       |          |
|-------------------|-----|------|----------------------|------------|-------|----------|
|                   |     |      |                      | White      | Black | Hispanic |
| DASP2009 Cases    | 50  | 33   | 24.5 yrs (10-32 yrs) | 40         | 1     | 8        |
| DASP2009 Controls | 100 | 50   | 20 yrs (18-30 yrs)   | 80         | 20    | 0        |
| DASP2010 Cases    | 50  | 22   | 21.5 yrs (6-50 yrs)  | 46         | 1     | 1        |
| DASP2010 Controls | 90  | 48   | 20 yrs (18-30 yrs)   | 71         | 19    | 0        |
| IASP2012 Cases    | 50  | 28   | 15 yrs (9-37 yrs)    | 43         | 6     | 1        |
| IASP2012 Controls | 90  | 45   | 20 yrs (18-30 yrs)   | 71         | 19    | 0        |

\*One DASP 2009 case was Asian and two DASP2010 cases were of unknown ethnicity

## SUPPLEMENTARY DATA

**Supplementary Figure 1.** A flow diagram showing the study design; Analysis of GADA assays participating in the DASP2010 and DASP2009 workshops identified systematic differences in the positivity of control samples according to assay type. Some of these differences were ascribed to altered recognition of epitopes in the N-terminal of GAD65. Three laboratories using radiobinding assays therefore tested two N-terminally truncated GAD constructs to determine whether they could improve assay performance. Ten laboratories then evaluated the performance of GADA assays using either  $^{35}\text{S}$ -labeled full-length GAD65(1-585) or N-terminally truncated GAD65(96-585) in the IASP2012 GADA substudy.

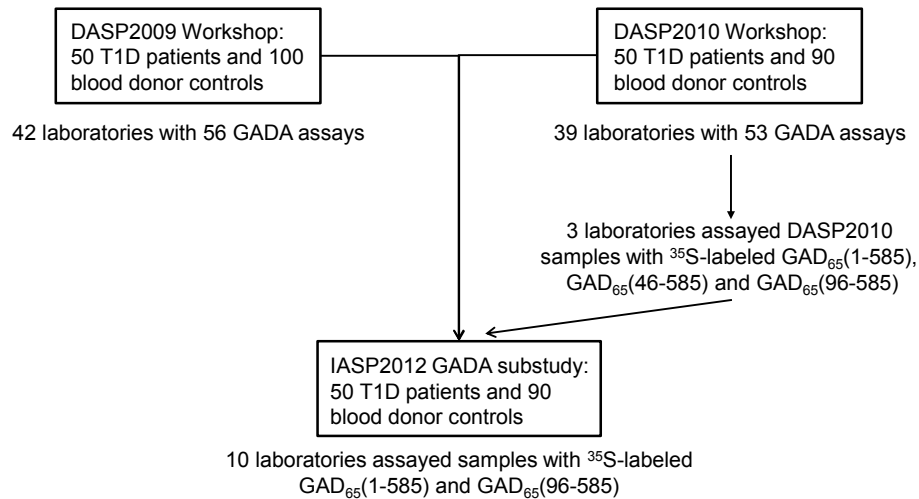

SUPPLEMENTARY DATA

**Supplementary Figure 2.** Binding of <sup>35</sup>S-labeled GAD<sub>65</sub>(1-585) (blue columns) and GAD<sub>65</sub>(96-585) (red columns) with 10 control sera (panels a and c) and 6 patient sera (panels b and d) included in the DASP2010 workshop following competitive displacement with 5 pmol/well (panels a & b) or 0.05 pmol/well (panels c and d) recombinant GAD<sub>65</sub>. Filled column areas represent displaced binding and open areas represent binding that does not compete. Patient sera show good displacement of binding at both concentrations of unlabeled GAD, and many control sera are displaced at 5 pmol/well unlabeled antigen. Most control sera however, including three reactive with epitopes in the middle region of GAD<sub>65</sub> (N51532, N56575 and N59932), show limited displacement at 0.05 pmol/well GAD<sub>65</sub> which indicates that these sera contain antibodies that are mainly of low affinity.

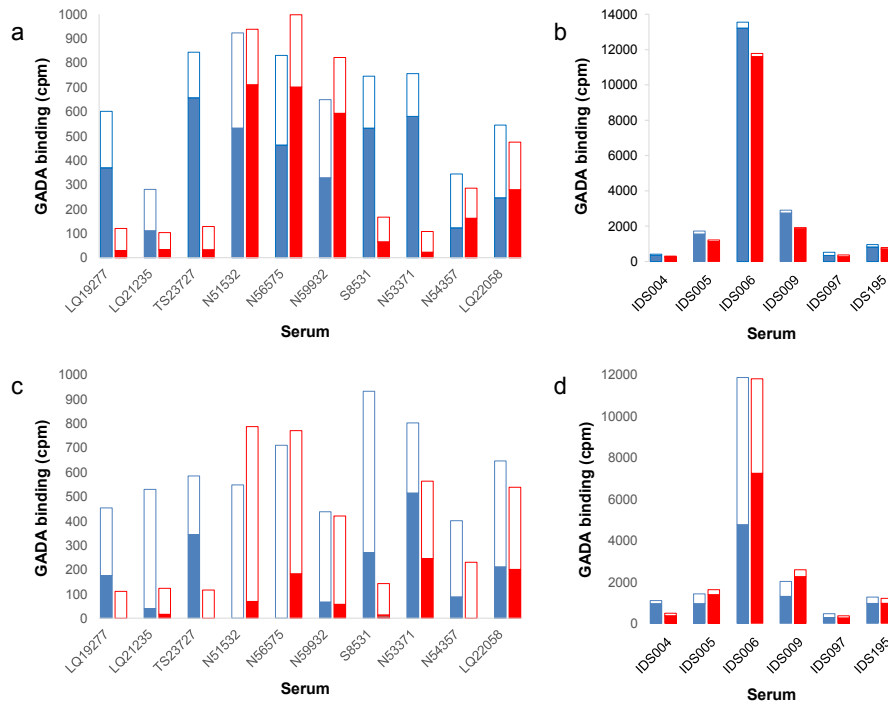

## SUPPLEMENTARY DATA

**Supplementary Figure 3.** Adjusted sensitivity at 95% specificity (AS95) of RBAs in three selected laboratories using radiolabel generated from three different GAD<sub>65</sub> plasmid constructs. The N-terminally truncated GAD<sub>65</sub>(96-585) gave the best performance in all laboratories.

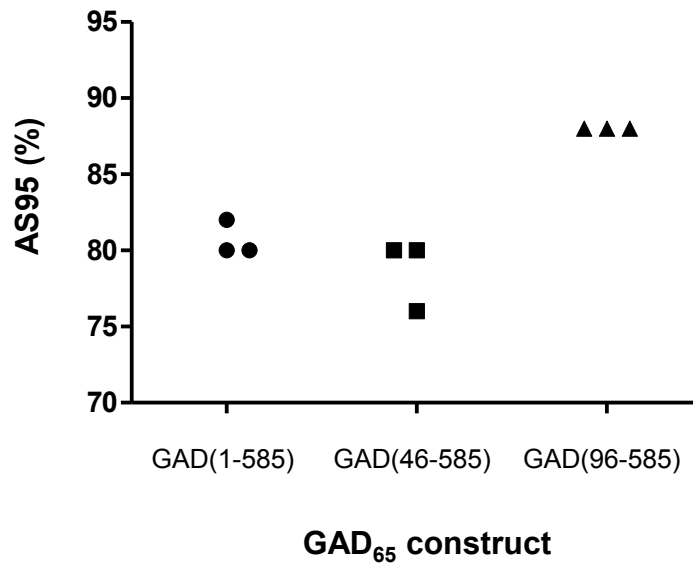

### Participating Laboratories and contacts for the DASP 2009 GADA workshop

P. Achenbach, A.-G. Ziegler, Diabetes Research Group of the TU Munich, Munich, Germany; J. Furmaniak, FIRS Laboratories RSR Limited, Cardiff, UK; Vinod Gaur, S.M. Marcovina, Northwest Lipid Metabolism and Diabetes Research Laboratory, University of Washington, Seattle, WA, USA; S. Gellert, Endocrinology Lab, Centre for Medical Research, Royal Melbourne Hospital, Melbourne, Australia; F. Gorus, J. De Grijse, P. Goubert, Dept of Clinical Chemistry and Radioimmunology, University of Brussels, Brussels, Belgium; W. A. Hagopian, Pacific North West Research Institute, Seattle, WA, USA; D.M. Harlan, J. Lee, Clinical Research Center, NIH, Bethesda, MD, USA; M. I. Hawa, Center for Diabetes and Metabolic Medicine, London, UK; E. Kawasaki, Department of Metabolism/Diabetes & Clinical Nutrition, Nagasaki University, Hospital of Medicine and Dentistry, Nagasaki, Japan; M. Knip, Hospital for Children and Adolescents, University of Helsinki, Helsinki, Finland; V. Lampasona, Laboratorio Autoimmunita-LIDEA, Diagnostica e Ricerca San Raffaele, Milan, Italy; P.W. Mueller, National Diabetes Laboratory, Centers for Disease Control and Prevention, Atlanta, GA, USA; A. Nilsson, F. Vaziri Sani, Diabetes and Celiac Disease Unit, Lund University, Malmö, Sweden; M. Schlosser, H. Kenk, Department of Medical Biochemistry and Molecular Biology, University of Greifswald, Karlsburg, Germany; C. Tiberti, F. Dotta, Department of Clinical Science, Immunoendocrinology, University of Rome "La Sapienza", Rome, Italy; P.A. Torjesen, Hormone Laboratory, Aker University Hospital, Oslo, Norway; M. Probst, T. Pfeiffer, S. Torkler, Euroimmun, Lübeck, Germany; R. Uibo, K. Reimand, Department of Immunology, University of Tartu, Tartu, Estonia; A.J.K. Williams, P.J. Bingley, Diabetes and Metabolism, University of Bristol, Bristol, UK; A. Xu, Z. Zhou, G. Huang, Diabetes Center, Institute of Metabolism and Endocrinology, 2nd Xiangya Hospital, Central South University, The University of Hong Kong, Hongkong, China; L. Yu, Barbara Davies Center for Childhood Diabetes, University of Colorado, Aurora, CO, USA; E. Poskus, S. Valdez, A. Cardoso, LIE, School of Pharmacy and Biochemistry, University of Buenos Aires, Buenos Aires, Argentina; M. Atkinson, C. Wasserfall, University of Florida, Gainesville, USA; N. Schloot, F. Zivehe, German Diabetes

## SUPPLEMENTARY DATA

Center, Institute for Clinical Diabetology, Dusseldorf, Germany; M.R. Batstra, T. Cieremans, Diagnostic Center SSDZ, Medical Laboratories Department of Medical Immunology, Delft, The Netherlands; R. Veijola, Department of Pediatrics, University of Oulu, Oulu, Finland; A. Pollard, J. Couper, Dept. of Paediatrics, Women's & Children's Hospital, Adelaide, Australia; Michael Eckhard, Diabetes and Endocrinology, UKGM, Giessen, Germany; L. Chatenoud, Immunologie Biologique, Hôpital Necker, University of Paris Descartes, Paris, France; T. Kobayashi, Third Department of Internal Medicine, University of Yamanashi, Yamanashi, Japan; I. Johansson, Division of Pediatrics, Department of Clinical and Experimental Medicine, Linköping University, Linköping, Sweden; D. Pittman, Department of Pathology, University of Florida, Gainesville, FL, USA; G. Houen, Department of Clinical Biochemistry and Immunology, Statens Serum Institute, Copenhagen, Denmark; C. Hampe, Jared Radtke, Metabolism, Endocrinology and Nutrition, Department of Medicine, University of Washington, Seattle, WA, USA; A. Esquerda, Clinical Laboratory, Arnau de Vilanova University Hospital, Lleida, Spain; A. Miettinen, Department of Immunology, HUSLAB, University of Helsinki, Helsinki, Finland; M.G. Baroni, Department of Experimental Medicine, University of Rome "La Sapienza", Rome, Italy; A. Caston-Balderrama, A. Fraser, M. French, Quest Diagnostics, Nichols Institute, San Juan Capistrano, CA, USA; L. Park, Department of Bioengineering, College of Engineering, Hanyang University, Seoul, South Korea; A. Pugliese, Immunogenetics Laboratory, Diabetes Research Institute, University of Miami, Miami, FL, USA; R. Casamitjana, Biochemistry and Molecular Genetics Department, University of Barcelona, Barcelona, Spain; W. Mlynarski, K. Wyka, Laboratory of Immunopathology and Genetics, Department of Pediatrics, Oncology, Hematology and Diabetology, UMED Medical University of Lodz, Lodz, Poland.

### Participating Laboratories and contacts for the DASP 2010 GADA workshop

P. Achenbach, A.-G. Ziegler, Diabetes Research Group of the TU Munich, Munich, Germany; J. Furmaniak, FIRS Laboratories RSR Limited, Cardiff, UK; Vinod Gaur, S.M. Marcovina, Northwest Lipid Metabolism and Diabetes Research Laboratory, University of Washington, Seattle, WA, USA; F. Gorus, K. Verhaeghen, P. Goubert, Department of Clinical Chemistry and Radioimmunology, University of Brussels, Brussels, Belgium; M. I. Hawa, Center for Diabetes and Metabolic Medicine, London, UK; W. A. Hagopian, Pacific North West Research Institute, Seattle, WA, USA; M. Knip, Hospital for Children and Adolescents, University of Helsinki, Helsinki, Finland; V. Lampasona, Laboratorio Autoimmunita-LIDEA, Diagnostica e Ricerca San Raffaele, Milan, Italy; P.W. Mueller, C. Mapango, National Diabetes Laboratory, Centers for Disease Control and Prevention, Atlanta, GA, USA; A. Nilsson, Diabetes and Celiac Disease Unit, Lund University, Malmö, Sweden; M. Schlosser, H. Kenk, Department of Medical Biochemistry and Molecular Biology, University of Greifswald, Karlsburg, Germany; C. Tiberti, F. Dotta, Department of Clinical Science, Immunoendocrinology, University of Rome "La Sapienza", Rome, Italy; P.A. Torjesen, Hormone Laboratory, Aker University Hospital, Oslo, Norway; R. Uibo, K. Reimand, Department of Immunology, University of Tartu, Tartu, Estonia; A.J.K. Williams, P.J. Bingley, Diabetes and Metabolism, University of Bristol, Bristol, UK; L. Yu, Barbara Davies Center for Childhood Diabetes, University of Colorado, Aurora, CO, USA; M.R. Batstra, T. Cieremans, Diagnostic Center SSDZ, Medical Laboratories Department of Medical Immunology, Delft, The Netherlands; R. Veijola, M. Knip, Department of Pediatrics, University of Oulu, Oulu, Finland; A. Pollard, J. Couper, Dept. of Paediatrics, Women's & Children's Hospital, Adelaide, Australia; L. Chatenoud, Immunologie Biologique, Hôpital Necker, University of Paris Descartes, Paris, France; T. Kobayashi, Third Department of Internal Medicine, University of Yamanashi, Yamanashi, Japan; I. Johansson, Division of Pediatrics, Department of Clinical and Experimental Medicine, Linköping University, Linköping, Sweden; D. Pittman, Department of Pathology, University of Florida, Gainesville, FL, USA; G. Houen, Y.M. Moreno, K. Lunau-Christensen, Department of Clinical Biochemistry and Immunology, Statens Serum Institute, Copenhagen, Denmark; C. Hampe, Jared Radtke, Metabolism, Endocrinology and Nutrition, Department of Medicine, University of Washington, Seattle, WA, USA; Aureli Esquerda, Clinical Laboratory, Arnau de Vilanova University Hospital, Lleida, Spain; A. Miettinen, Department of Immunology, HUSLAB, University of Helsinki, Helsinki, Finland; B Ekholm, Diabetes Research Laboratory, Department of Clinical Sciences, Lund University, Sweden; L. Castaño, R. Bilbao, Endocrinology and Diabetes Research Group, Hospital de Cruces, Barakaldo, Bizkaia, Spain; M.R. Christie, Diabetes Research Group, King's College London, London, UK; C. Giordano, Biomedical Department of Internal and Specialist Medicine, Section of Endocrinology, Diabetology, and Metabolism, University of Palermo, Palermo, Italy; R. Pujol-Borrell, E. Martínez Cáceres, Immunology Lab, LIRAD-BST-HUGTP, Germans Trias Pujol University Hospital, UAB, Badalona, Spain; W. Mlynarski, K. Wyka, Laboratory of Immunopathology and Genetics,

## SUPPLEMENTARY DATA

Department of Pediatrics, Oncology, Hematology and Diabetology, UMED Medical University of Lodz, Lodz, Poland; J. Siftancova, Laboratory of Autoimmune Diseases, Paediatric Department, University Hospital Motol and 2nd Faculty of Medicine, Charles University in Prague, Prague, Czech Republic; T. McDonald, Clinical Chemistry and Immunology, Royal Devon and Exeter Hospital, UK; J. Knezevic Cuca, Immunology of Diabetes Unit, Institute of Clinical Chemistry and Laboratory Medicine, Merkur University Hospital, Zagreb, Croatia; R. Casamitjana, Biochemistry and Molecular Genetics Department, University of Barcelona, Barcelona, Spain; H.-J. Thiesen, Institute for Immunology, STZ für Proteom-Analyse, Rostock, Germany; S. Scheucher, LKH-University Klinikum, Graz, Austria.

### Participating Laboratories and contacts for the IASP2012 GADA substudy

P. Achenbach, A.-G. Ziegler, Diabetes Research Group of the TU Munich, Munich, Germany; F. Gorus, K. Verhaeghen, P. Goubert, Department of Clinical Chemistry and Radioimmunology, University of Brussels, Brussels, Belgium; M. Knip, Hospital for Children and Adolescents, University of Helsinki, Helsinki, Finland; M. Schlosser, H. Kenk, Department of Medical Biochemistry and Molecular Biology, University of Greifswald, Karlsburg, Germany; R. Uibo, K. Reimand, Department of Immunology, University of Tartu, Tartu, Estonia; A.J.K. Williams, P.J. Bingley, Diabetes and Metabolism, University of Bristol, Bristol, UK; M.R. Christie, Diabetes Research Group, King's College London, London, UK; A. Xu, Z. Zhou, G. Huang, Diabetes Center, Institute of Metabolism and Endocrinology, 2nd Xiangya Hospital, Central South University, The University of Hong Kong, Hongkong, China; T Yang, Department of Endocrinology, First Affiliated Hospital of Nanjing Medical University, Nanjing, China; E. Kawasaki, Department of Metabolism/Diabetes & Clinical Nutrition, Nagasaki University, Hospital of Medicine and Dentistry, Nagasaki, Japan.
